# Supplementary material for: Structural Basis for Linezolid Binding Site Rearrangement in the Staphylococcus aureus Ribosome
Source: PubMed Central journal article supplement (PMC5424203; doi:10.1128/mbio.00395-17), 2017-05-09
Supplement: mbo002173303sf1.pdf [file mbo002173303sf1.pdf]

**a**

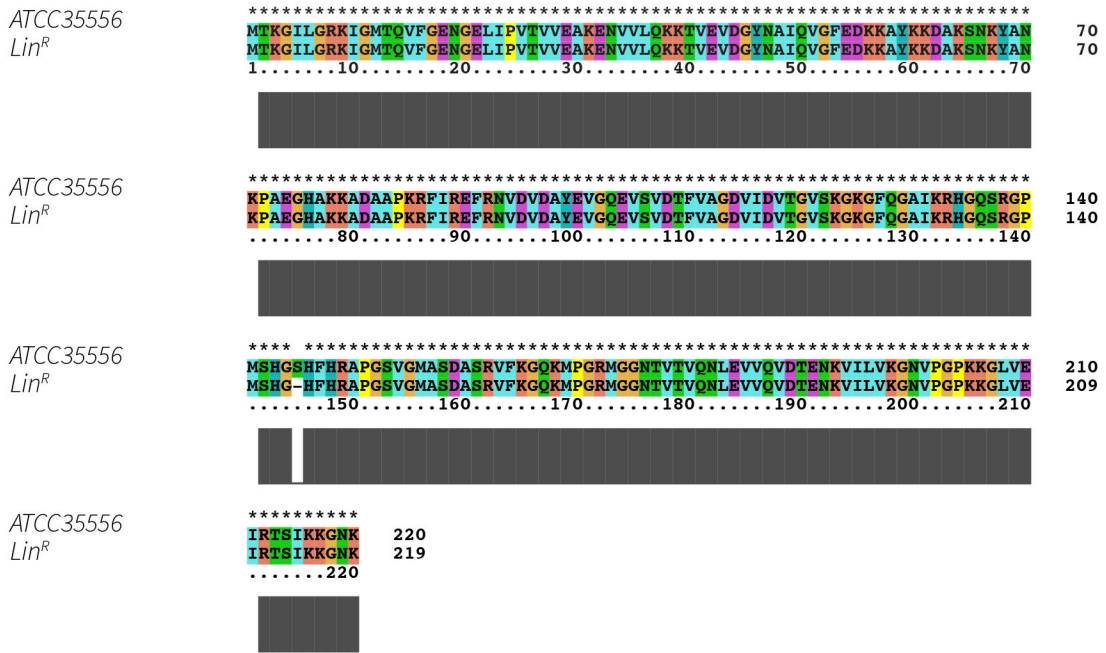

**Supplementary Figure S1. The *Lin<sup>R</sup>* mutation in *rpsC*.** The protein sequence alignment is based on sequencing of the *rpsC* gene (encoding ribosomal protein uL3) from both *S. aureus* ATCC35556 and from the *Lin<sup>R</sup>* strain.
