# Supplementary material for: Structural Basis for Linezolid Binding Site Rearrangement in the Staphylococcus aureus Ribosome
Source: PubMed Central journal article supplement (PMC5424203; doi:10.1128/mbio.00395-17), 2017-05-09
Supplement: mbo002173303sf2.pdf [file mbo002173303sf2.pdf]

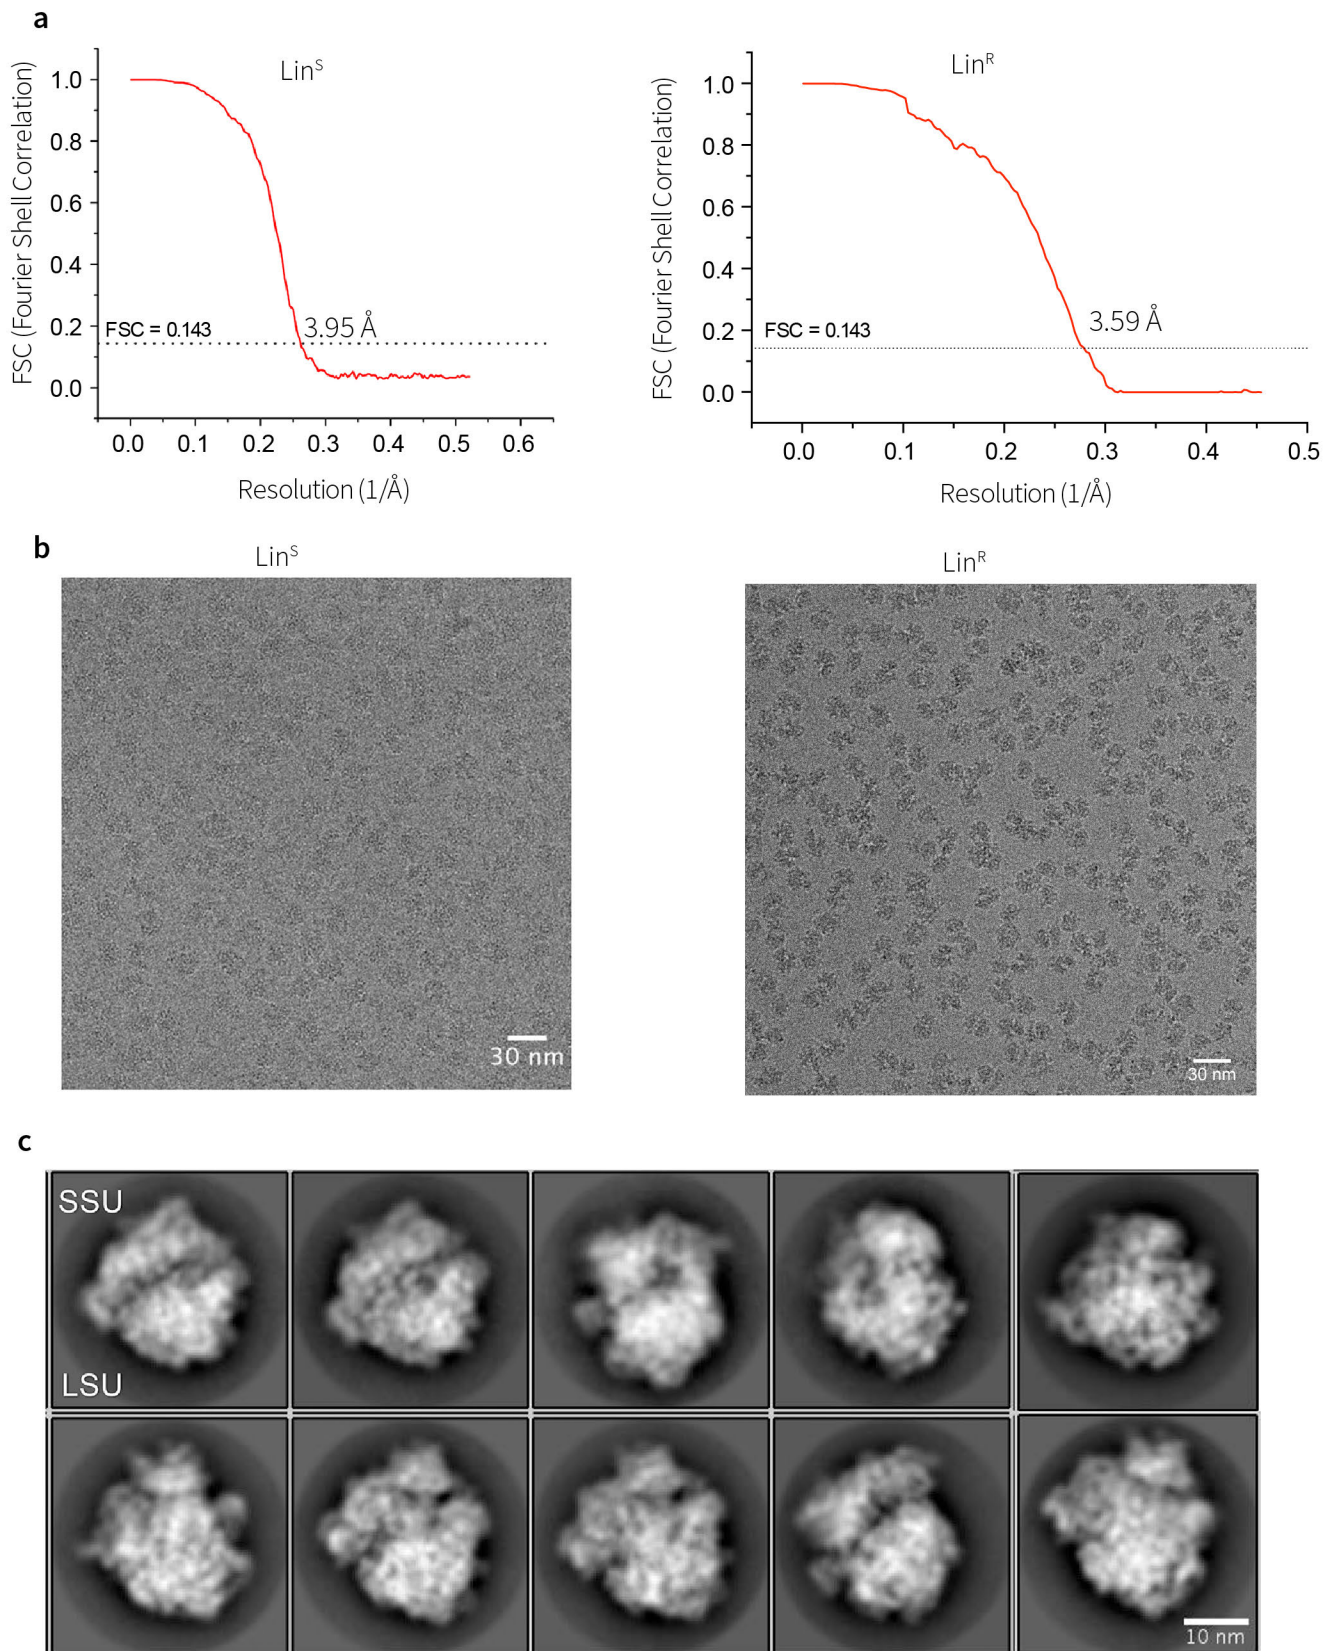

**Supplementary Figure S2. Cryo-EM data and processing.** **a.** Fourier Shell Correlation (FSC) plot of the final 3D map indicates a resolution of 3.95 Å for the Lin<sup>S</sup> ribosome and 3.59 Å for the Lin<sup>R</sup> ribosome (FSC=0.143 criteria). **b.** Representative cryo-EM micrographs showing distribution of 70S ribosomal particles on grid recorded at -1.8 μm defocus (scale bar, 30 nm). **c.** Representative 2D class averages of the Lin<sup>S</sup> 70S ribosome showing well defined density for both the LSU and SSU (scale bar, 10 nm).
