# Supplementary material for: Structural Basis for Linezolid Binding Site Rearrangement in the Staphylococcus aureus Ribosome
Source: PubMed Central journal article supplement (PMC5424203; doi:10.1128/mbio.00395-17), 2017-05-09
Supplement: mbo002173303st1.pdf [file mbo002173303st1.pdf]

**Supplementary Table S1. Model Parameters**

| <b>Data Collection</b>            | <i>Lin<sup>R</sup></i> | <i>Lin<sup>S</sup></i> |
|-----------------------------------|------------------------|------------------------|
| Particles                         | 80,500                 | 126,000                |
| Pixel size (Å)                    | 1.1                    | 0.96                   |
| Defocus range (µm)                | 0.6-3.5                | 1.0-2.7                |
| Voltage (kV)                      | 300                    | 200                    |
| Electron dose (e/Å <sup>2</sup> ) | 45                     | 40                     |
| <b>Refinement</b>                 |                        |                        |
| CC <sub>map_model</sub>           | 0.74                   | 0.73                   |
| <b>Model Quality</b>              |                        |                        |
| <i>RMSD</i>                       |                        |                        |
| Bond length (Å) / Bond angles (°) | 0.008 / 0.98           | 0.009/1.1              |
| <i>Ramachandran</i>               |                        |                        |
| Most favored (%)                  | 88.1                   | 82.9                   |
| Outliers (%)                      | 0.12                   | 0.30                   |
| Favoured (%)                      | 11.8                   | 16.8                   |
| <i>Rotamer outliers</i>           | 0.19                   | 0.83                   |
| <i>C-Beta deviations</i>          | 0                      | 0                      |
| <i>Clashscore</i>                 | 3.63                   | 5.76                   |
